# Supplementary material for: Development of models of care coordination for rare conditions: a qualitative study
Source: Springer Nature journal article supplement (doi:10.1186/s13023-022-02190-3), 2022-02-14

# CONCORD Flow Chart demonstrating how taxonomy options can be used to develop models of care coordination

PLEASE START HERE

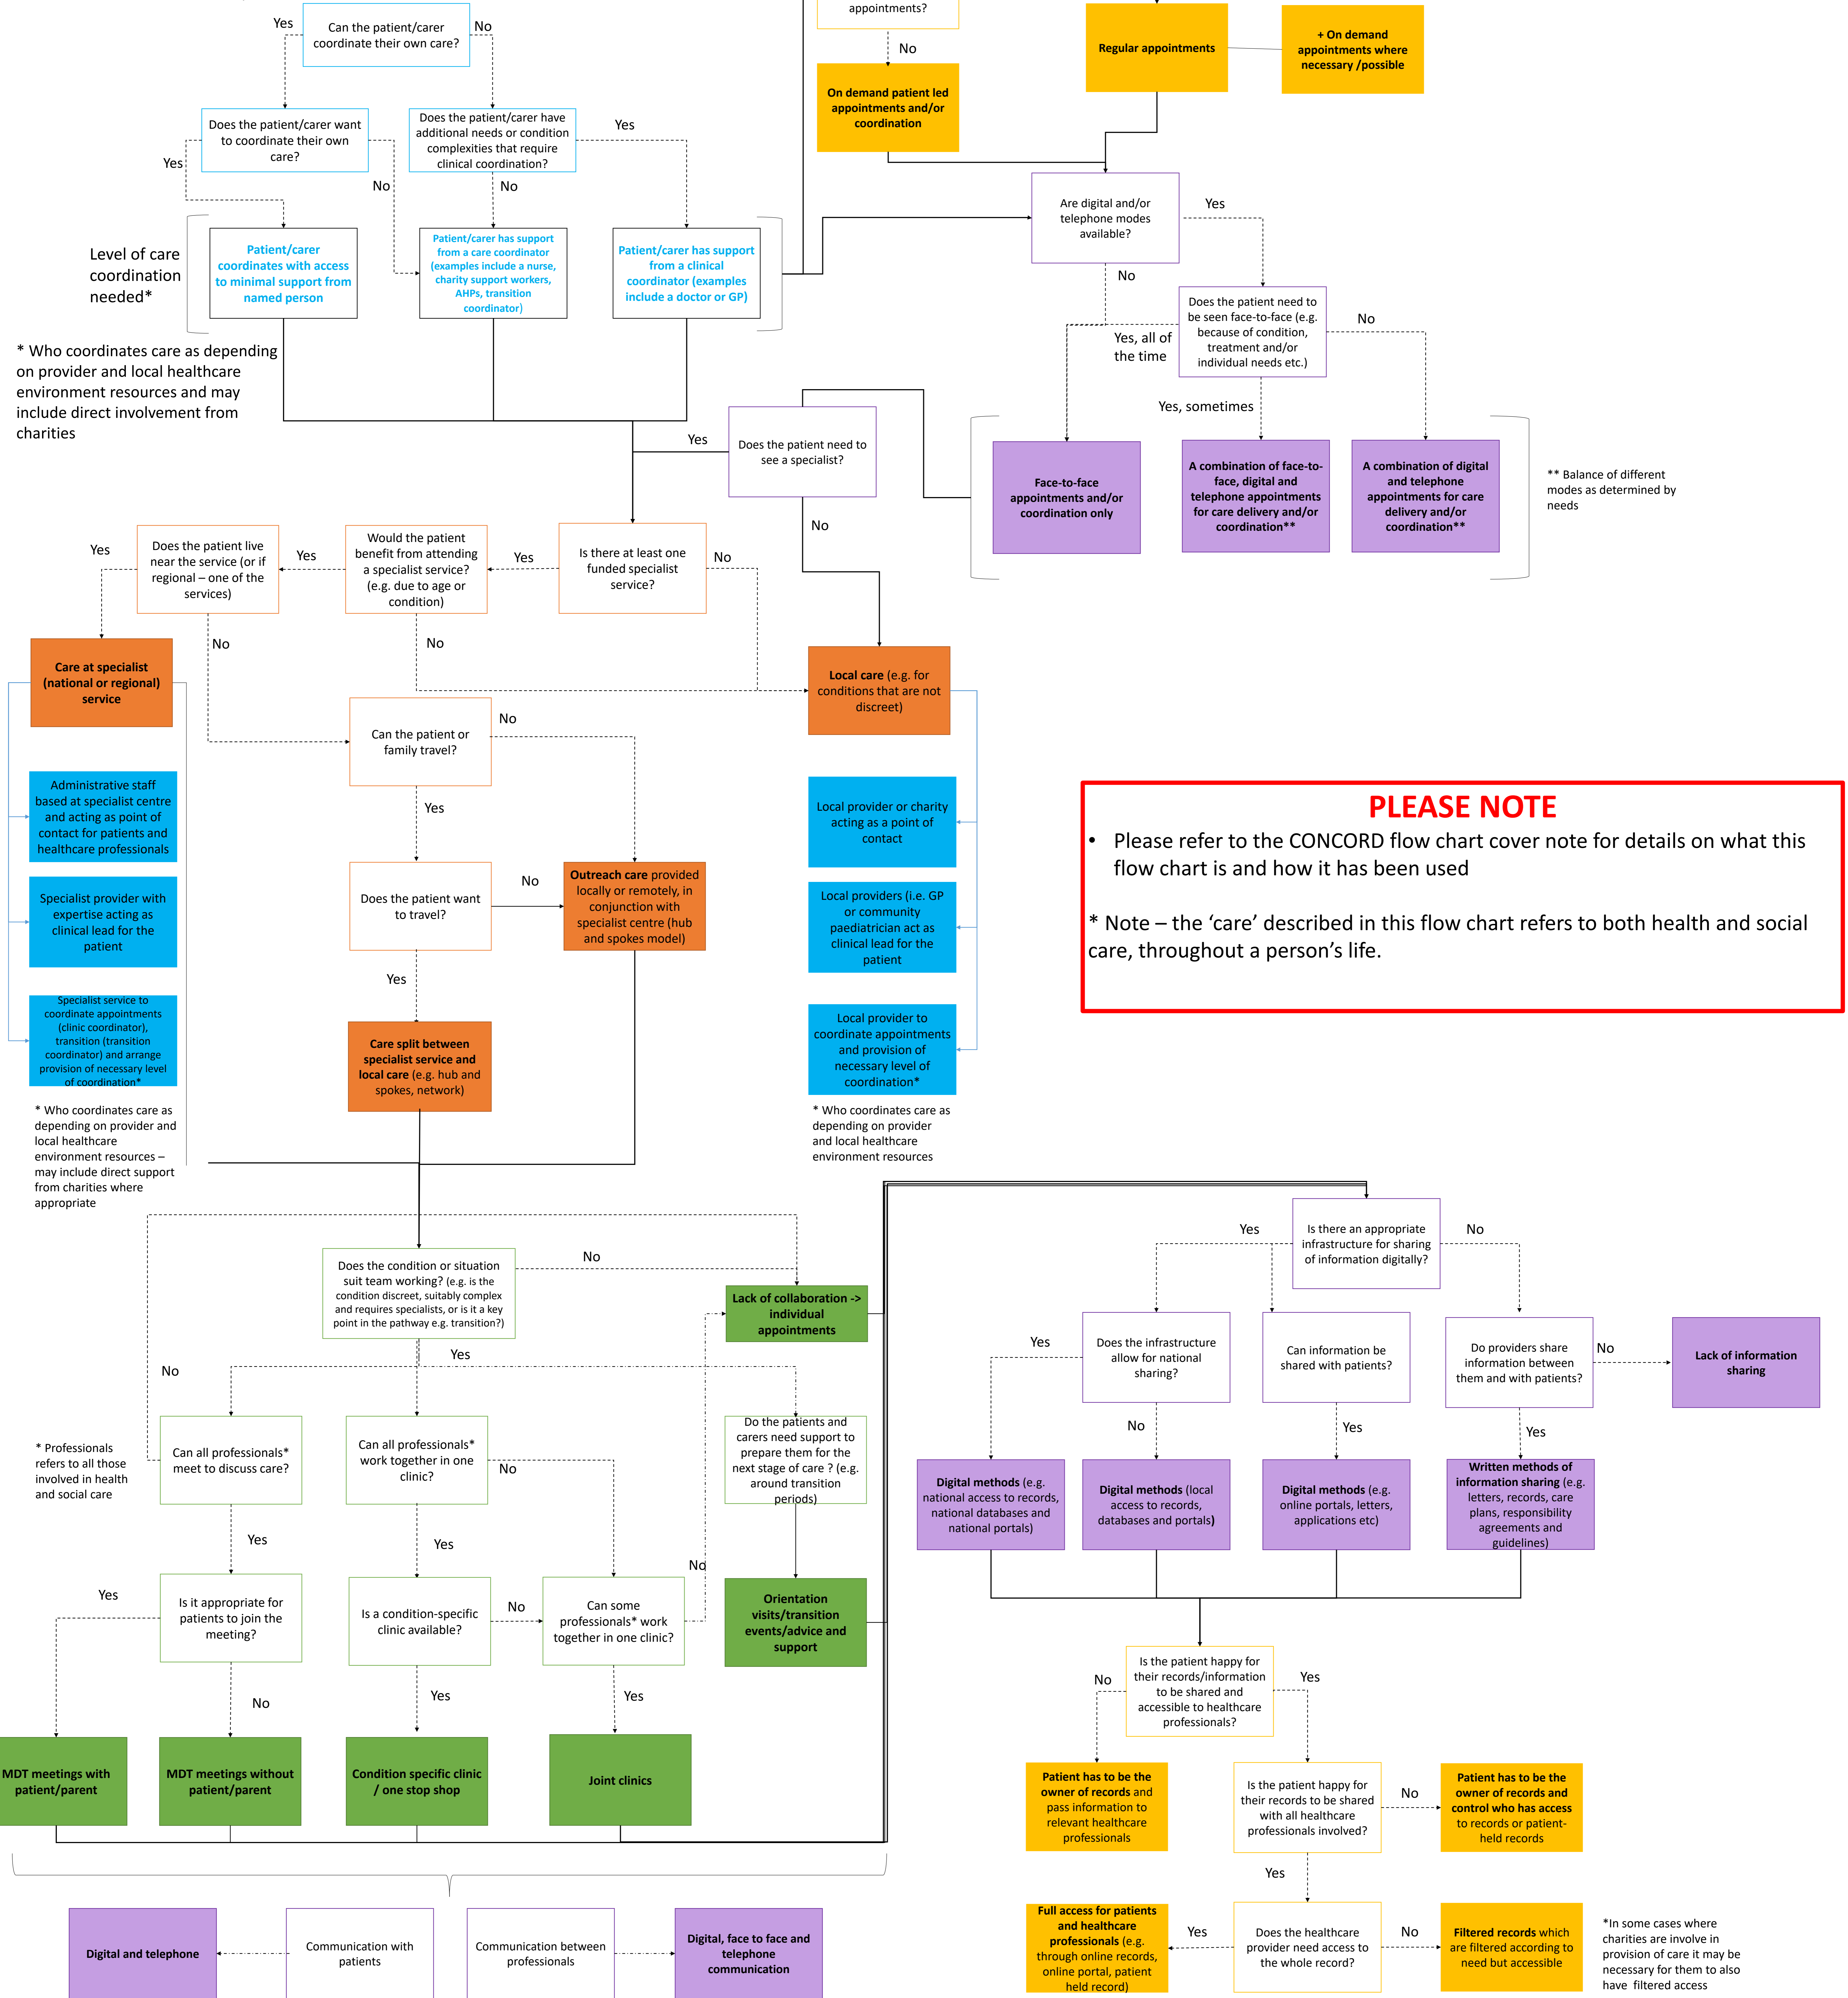

Supplement: MOESM4 [file 20131204]
